# Supplementary material for: Intra-specific Niche Partitioning in Antarctic Fur Seals, Arctocephalus gazella
Source: PubMed Central journal article supplement (PMC7039921; doi:10.1038/s41598-020-59992-3), 2020-02-24
Supplement: 41598_2020_59992_MOESM1_ESM.pdf [file 41598_2020_59992_MOESM1_ESM.pdf]

## Supplementary Material

### **Intra-specific Niche Partitioning in Antarctic Fur Seals, *Arctocephalus gazella***

Kayleigh Jones<sup>1,2</sup>, Norman Ratcliffe<sup>1</sup>, Stephen C. Votier<sup>2</sup>, Jason Newton<sup>3</sup>, Jaume Forcada<sup>1</sup>, John Dickens<sup>1</sup>, Gabriele Stowasser<sup>1</sup>, Iain J. Staniland<sup>1</sup>

<sup>1</sup>British Antarctic Survey; <sup>2</sup>University of Exeter; <sup>3</sup>Scottish Universities Environmental Research Centre

**Supplementary Figure S1.** Oscillations in  $\delta^{13}\text{C}$  values along the length of whiskers (from the distal to facial end) in (a–c) three male Antarctic fur seal whiskers (IDs = w8315, w8580 and w8675 respectively) and (d–f) three female whiskers (IDs = w8868, w8858 and w8870 respectively). Points are  $\delta^{13}\text{C}$  values of samples taken every 5 mm along the length of each whisker and lines join these points. Male age was determined by external growth ridges on canines and minimum female age was determined by whisker growth rates.

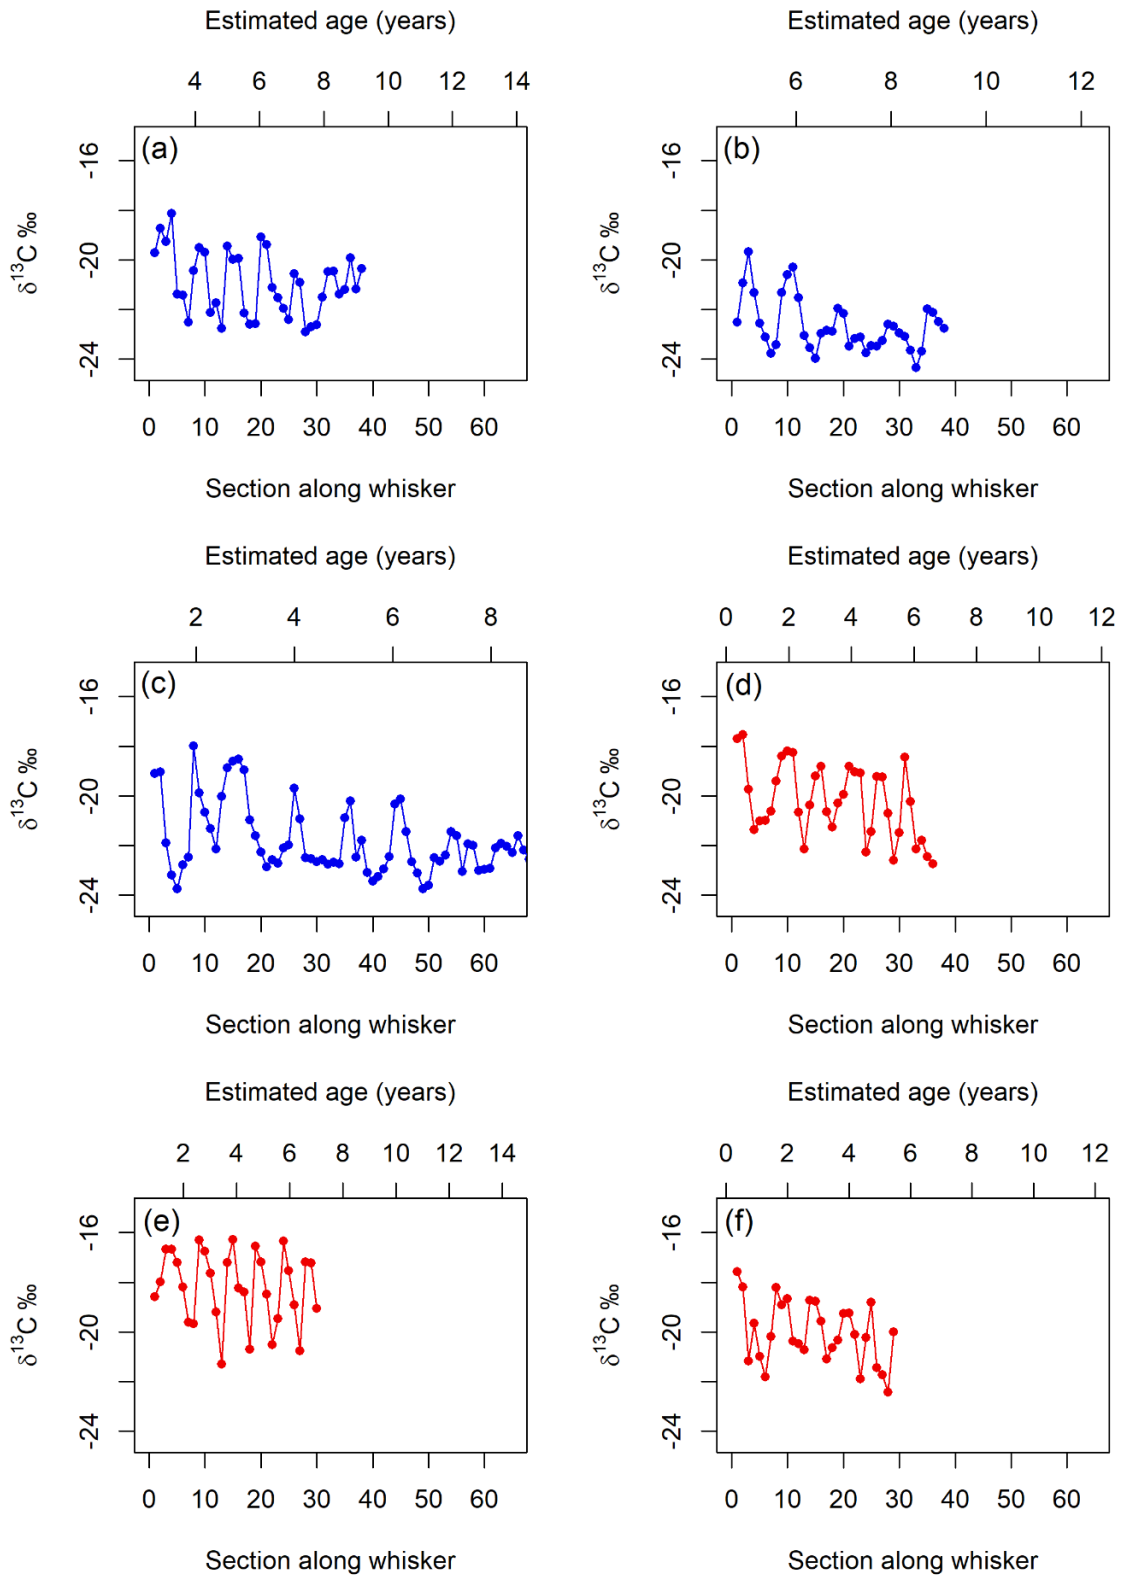

**Supplementary Figure S2.** Bi-plot showing the mean (points) and standard deviation (lines) of  $\delta^{13}\text{C}$  and  $\delta^{15}\text{N}$  values of each prey species (Antarctic krill, *Euphausia superba*, and myctophids (remainder of species)) collected at two sample locations at the Polar Front (50.0632° S, 34.0287° W and 49.9357° S, 34.2078° W) in Autumn 2009.

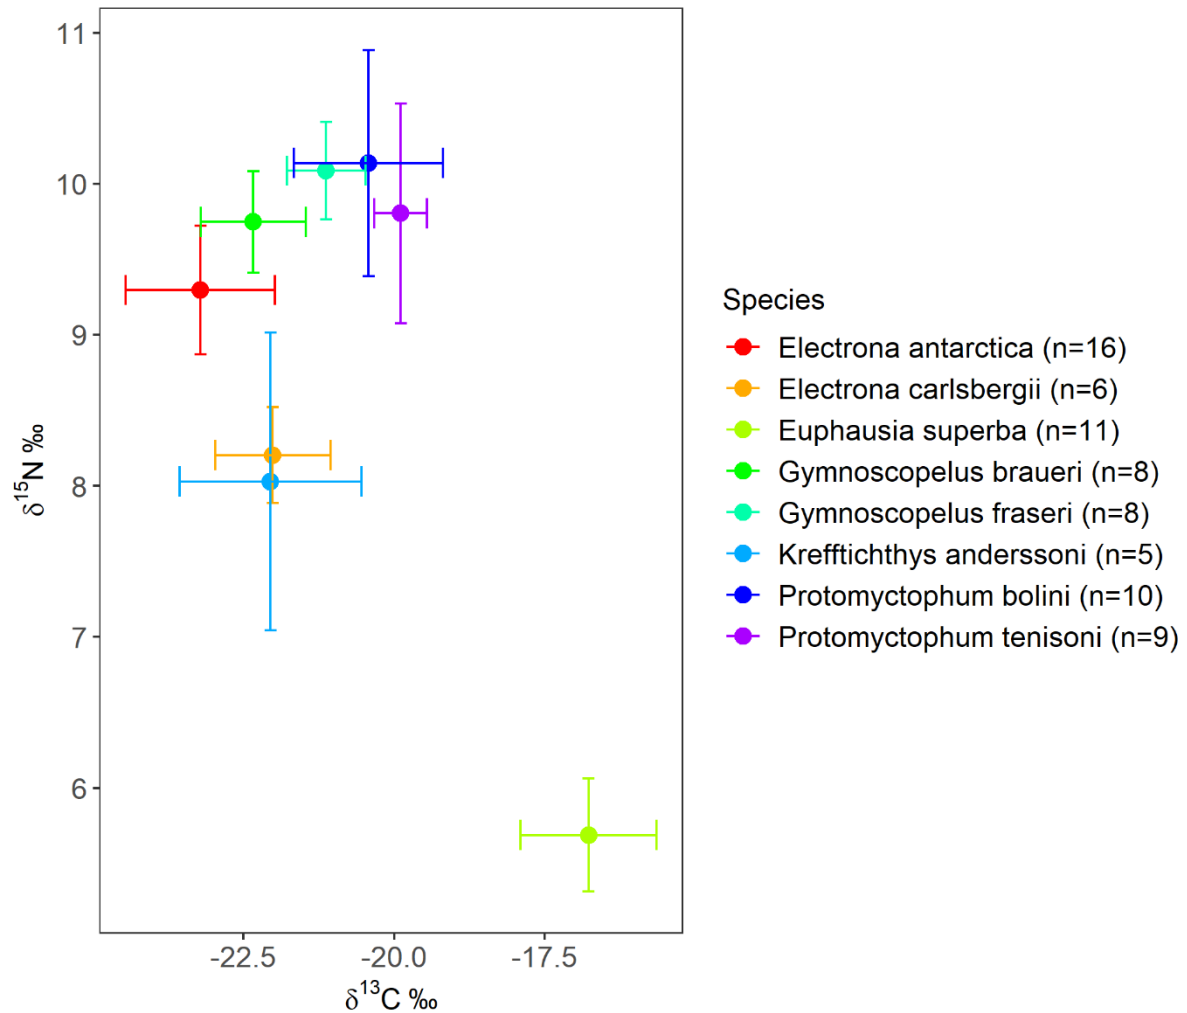

**Supplementary Table S3.** Length of the longest whisker on the right side of the face of 20 live adult female Antarctic fur seals, as well as body length, estimated age based on body length alone, minimum estimated age based on oscillations in  $\delta^{13}\text{C}$  values along each whisker and minimum and maximum  $\delta^{13}\text{C}$  and  $\delta^{15}\text{N}$  value along each whisker. Asterisks indicate that a weaning signal (characterised by high  $\delta^{15}\text{N}$  values followed by a drop) was present at the distal end of the whisker.

| <b>ID</b> | <b>Whisker length (cm)</b> | <b>Body length (cm)</b> | <b>Estimated age using body length</b> | <b>Minimum age using oscillations in <math>\delta^{13}\text{C}</math> (%)</b> | <b>Min <math>\delta^{13}\text{C}</math> (%)</b> | <b>Max <math>\delta^{13}\text{C}</math> (%)</b> | <b>Min <math>\delta^{15}\text{N}</math> (%)</b> | <b>Max <math>\delta^{15}\text{N}</math> (%)</b> |
|-----------|----------------------------|-------------------------|----------------------------------------|-------------------------------------------------------------------------------|-------------------------------------------------|-------------------------------------------------|-------------------------------------------------|-------------------------------------------------|
| w8851     | 17.4                       | 130.5                   | Unknown                                | 7.7                                                                           | -22.18                                          | -17.98                                          | 6.83                                            | 10.46                                           |
| w8852     | 16.0                       | 128                     | Unknown                                | 7.4                                                                           | -21.80                                          | -15.76                                          | 7.72                                            | 14.42                                           |
| w8854     | 14.4                       | 118.75                  | 3                                      | 5.6                                                                           | -22.21                                          | -18.18                                          | 7.35                                            | 10.39                                           |
| w8855     | 13.3                       | 126                     | 6                                      | 7.0                                                                           | -19.32                                          | -16.38                                          | 8.80                                            | 12.63                                           |
| w8856     | 11.4                       | 119.5                   | 3                                      | 4.0                                                                           | -21.94                                          | -16.72                                          | 8.27                                            | 13.08                                           |
| w8857     | 16.6                       | 128.5                   | Unknown                                | 10.4                                                                          | -22.04                                          | -16.06                                          | 8.80                                            | 14.84                                           |
| w8858     | 15.0                       | 123                     | 4                                      | 6.8                                                                           | -21.31                                          | -16.28                                          | 8.36                                            | 12.69                                           |
| w8859     | 16.5                       | 120.25                  | 4                                      | 6.6*                                                                          | -23.01                                          | -17.87                                          | 7.79                                            | 11.51                                           |
| w8860     | 13.0                       | 134                     | Unknown                                | 8.6                                                                           | -19.02                                          | -16.51                                          | 8.27                                            | 12.74                                           |
| w8862     | 16.6                       | 125.5                   | 6                                      | 7.6                                                                           | -22.70                                          | -17.92                                          | 7.44                                            | 10.03                                           |
| w8863     | 30.6                       | 124.5                   | 5                                      | 13.7                                                                          | -22.60                                          | -16.62                                          | 7.23                                            | 12.13                                           |
| w8864     | 16.8                       | 121.25                  | 4                                      | 8.2                                                                           | -20.35                                          | -15.38                                          | 8.53                                            | 14.32                                           |
| w8865     | 25.7                       | 131.75                  | Unknown                                | 10.2                                                                          | -22.57                                          | -17.49                                          | 7.04                                            | 10.81                                           |
| w8867     | 12.9                       | 126                     | 5                                      | 5.6*                                                                          | -22.74                                          | -17.98                                          | 7.61                                            | 10.68                                           |
| w8868     | 18.0                       | 117                     | 3                                      | 6.4*                                                                          | -22.75                                          | -17.53                                          | 7.61                                            | 12.26                                           |
| w8869     | 15.5                       | 122                     | 4                                      | 6.8*                                                                          | -22.14                                          | -17.75                                          | 7.12                                            | 10.74                                           |
| w8870     | 14.6                       | 120.75                  | 4                                      | 5.3*                                                                          | -22.43                                          | -17.58                                          | 7.37                                            | 10.93                                           |
| w8871     | 14.3                       | 118                     | 3                                      | 6.1*                                                                          | -22.62                                          | -17.74                                          | 7.49                                            | 12.42                                           |
| w8874     | 11.0                       | 119.25                  | 3                                      | 6.0                                                                           | -22.23                                          | -18.12                                          | 7.66                                            | 11.32                                           |
| w9150     | 16.1                       | 112                     | 3                                      | 8.8                                                                           | -22.20                                          | -16.87                                          | 7.31                                            | 11.19                                           |

**Supplementary Table S4.** Length of the longest whisker on the right side of the face of 20 dead adult male Antarctic fur seals, as well as body length, estimated age based on external growth ridges in the upper canine and minimum and maximum  $\delta^{13}\text{C}$  and  $\delta^{15}\text{N}$  value along each whisker. Body length could not be measured for decomposed males.

| <b>ID</b> | <b>Whisker length (cm)</b> | <b>Body length (cm)</b> | <b>Estimated age using canine</b> | <b>Min <math>\delta^{13}\text{C}</math> (%)</b> | <b>Max <math>\delta^{13}\text{C}</math> (%)</b> | <b>Min <math>\delta^{15}\text{N}</math> (%)</b> | <b>Max <math>\delta^{15}\text{N}</math> (%)</b> |
|-----------|----------------------------|-------------------------|-----------------------------------|-------------------------------------------------|-------------------------------------------------|-------------------------------------------------|-------------------------------------------------|
| w8278     | 15.6                       | 181                     | 10                                | -23.30                                          | -20.86                                          | 7.93                                            | 11.11                                           |
| w8313     | 19.0                       | 172                     | 8                                 | -22.92                                          | -18.13                                          | 7.24                                            | 11.70                                           |
| w8328     | 41.5                       | 169                     | 9                                 | -23.47                                          | -19.53                                          | 7.11                                            | 10.26                                           |
| w8429     | 31.0                       | 180                     | 9                                 | -23.02                                          | -19.43                                          | 7.22                                            | 10.25                                           |
| w8522     | 26.3                       | 181                     | 10                                | -23.47                                          | -19.23                                          | 7.82                                            | 11.79                                           |
| w8525     | 28.2                       | 182                     | 9                                 | -23.09                                          | -19.08                                          | 7.37                                            | 10.82                                           |
| w8580     | 19.1                       | 173                     | 8                                 | -24.36                                          | -19.67                                          | 7.79                                            | 10.36                                           |
| w8610     | 17.2                       | 177.5                   | 9                                 | -25.05                                          | -20.56                                          | 7.75                                            | 12.98                                           |
| w8614     | 30.3                       | -                       | 9                                 | -23.80                                          | -18.48                                          | 7.30                                            | 11.74                                           |
| w8627     | 22.6                       | 183                     | 8                                 | -23.21                                          | -20.23                                          | 7.84                                            | 11.65                                           |
| W8640     | 24.7                       | 168                     | 9                                 | -23.67                                          | -19.00                                          | 7.59                                            | 10.81                                           |
| w8675     | 36.5                       | 177                     | 8                                 | -23.75                                          | -17.98                                          | 6.72                                            | 10.39                                           |
| w8730     | 22.2                       | 179                     | 8                                 | -23.16                                          | -19.00                                          | 7.62                                            | 11.07                                           |
| w8737     | 22.1                       | 178                     | 9                                 | -23.21                                          | -20.07                                          | 7.94                                            | 10.34                                           |
| w8787     | 30.6                       | 182                     | 8                                 | -23.37                                          | -19.30                                          | 7.70                                            | 13.07                                           |
| w8820     | 23.5                       | -                       | 8                                 | -24.35                                          | -18.73                                          | 7.56                                            | 10.34                                           |
| w8821     | 34.2                       | -                       | 8                                 | -23.00                                          | -16.91                                          | 7.59                                            | 13.52                                           |
| w8853     | 25.1                       | -                       | 9                                 | -23.38                                          | -19.83                                          | 7.51                                            | 10.01                                           |
| w8901     | 28.8                       | -                       | 10                                | -23.32                                          | -19.61                                          | 6.90                                            | 12.98                                           |
| w9034     | 16.5                       | 192                     | 8                                 | -23.33                                          | -18.34                                          | 8.22                                            | 10.91                                           |

**Supplementary Figure S5.** Relationship between Principal Component 1 (explaining 73.9 % of variability) and Principal Component 2 (explaining 18.2 % of variability) of morphology measurements taken from 14 female Antarctic fur seals (red; Group 1; those with lower mean  $\delta^{13}\text{C}$  values than estimated whisker  $\delta^{13}\text{C}$  value at the Polar Front) and 6 female Antarctic fur seals (grey; Group 2; those with higher mean  $\delta^{13}\text{C}$  value than estimated whisker  $\delta^{13}\text{C}$  value at the Polar Front).

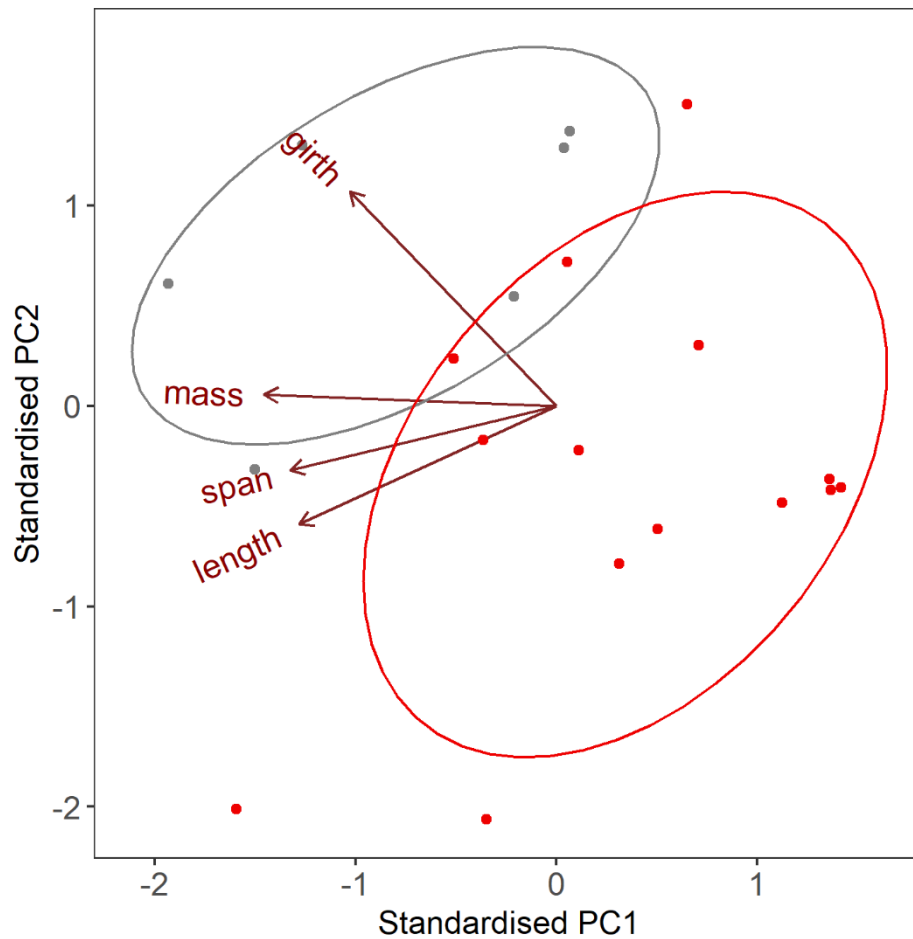

**Supplementary Table S6.** Standard Ellipse Areas (SEAs) and Bayesian Standard Ellipse Areas ( $SEA_B$ ) quantifying the isotopic niches of 20 male Antarctic fur seals throughout ontogeny using  $\delta^{15}\text{N}$  and  $\delta^{13}\text{C}$  values along whiskers.

| Male age (years) | SEA   | $SEA_B$ mode | $SEA_B$ 95% confidence interval | No. of males | No. of male whisker samples |
|------------------|-------|--------------|---------------------------------|--------------|-----------------------------|
| 0.5 – 1          | 0.640 | 0.562        | 0.177 – 2.123                   | 2            | 6                           |
| 1 – 2            | 5.710 | 5.610        | 3.947 – 7.745                   | 4            | 17                          |
| 2 – 3            | 3.800 | 3.756        | 2.951 – 4.837                   | 10           | 47                          |
| 3 – 4            | 3.611 | 3.601        | 2.988 – 4.328                   | 17           | 92                          |
| 4 – 5            | 3.310 | 3.311        | 2.774 – 3.880                   | 19           | 128                         |
| 5 – 6            | 3.916 | 3.898        | 3.286 – 4.629                   | 19           | 131                         |
| 6 – 7            | 3.256 | 3.259        | 2.745 – 3.824                   | 20           | 140                         |
| 7 – 8            | 3.813 | 3.814        | 3.219 – 4.506                   | 20           | 141                         |
| 8 – 9            | 2.573 | 2.576        | 2.185 – 3.002                   | 20           | 145                         |
| 9 – 10           | 1.914 | 1.873        | 1.525 – 2.403                   | 12           | 87                          |
| 10 – 11          | 1.488 | 1.421        | 0.922 – 2.373                   | 6            | 42                          |

**Supplementary Table S7.** Standard Ellipse Areas (SEAs) and Bayesian Standard Ellipse Areas ( $SEA_B$ ) quantifying the overlap in isotopic niches of 20 males with 14 females in female Group 1 (those with lower mean  $\delta^{13}\text{C}$  values than estimated whisker  $\delta^{13}\text{C}$  value at the Polar Front) throughout male ontogeny using  $\delta^{15}\text{N}$  and  $\delta^{13}\text{C}$  values along whiskers.

| Male age (years) | SEA overlap | $SEA_B$ overlap mode | $SEA_B$ overlap 95% confidence interval | No. of males | No. of male whisker samples |
|------------------|-------------|----------------------|-----------------------------------------|--------------|-----------------------------|
| 0.5 – 1          | 0           | 0                    | NA                                      | 2            | 6                           |
| 1 – 2            | 14.832      | 14.203               | 6.586 – 22.212                          | 4            | 17                          |
| 2 – 3            | 30.785      | 27.687               | 22.562 – 39.125                         | 10           | 47                          |
| 3 – 4            | 22.600      | 21.611               | 15.138 – 27.873                         | 17           | 92                          |
| 4 – 5            | 10.321      | 10.258               | 5.959 – 15.371                          | 19           | 128                         |
| 5 – 6            | 5.675       | 5.792                | 1.857 – 9.473                           | 19           | 131                         |
| 6 – 7            | 0.00154     | 0.001                | 0.000 – 0.224                           | 20           | 140                         |
| 7 – 8            | 0.000       | 0.001                | 0.000 – 0.021                           | 20           | 141                         |
| 8 – 9            | 0.000       | 0.000                | NA                                      | 20           | 145                         |
| 9 – 10           | 0.000       | 0.000                | NA                                      | 12           | 87                          |
| 10 – 11          | 0.000       | 0.000                | NA                                      | 6            | 42                          |
